# Supplementary material for: The CbrB Regulon: Promoter dissection reveals novel insights into the CbrAB expression network in Pseudomonas putida
Source: PubMed Central journal article supplement (PMC6296734; doi:10.1371/journal.pone.0209191), 2018-12-17
Supplement: pone.0209191.s005.pdf [file pone.0209191.s005.pdf]

**S1 Table. Strains and plasmids used in this study**

| Strains          | Genotype/ phenotype                                                                                                                                                                          | Reference/ source |
|------------------|----------------------------------------------------------------------------------------------------------------------------------------------------------------------------------------------|-------------------|
| <i>E. coli</i>   |                                                                                                                                                                                              |                   |
| DH5 $\alpha$     | <i>recA1 endA1 hsdR17 supE44 thi-1 gyrA96 relA1D (lacZYA-argF U169</i><br>[ $\phi$ 80 <i>dlacZDM15</i> ] F <sup>-</sup> Nal <sup>r</sup> )                                                   | [1]               |
| NCM631           | <i>hsdS gal</i> $\lambda$ DE3: <i>lacI lacUV5:genI</i> (T7 RNA polymerase) $\Delta$ <i>lac</i> linked to Tn10                                                                                | [2]               |
| <i>P. putida</i> |                                                                                                                                                                                              |                   |
| KT2440           | mt-2 <i>hsdR1</i> (r <sup>-</sup> m <sup>+</sup> )                                                                                                                                           | [3]               |
| IHF3             | KT2440 mt-2 <i>hsdR1</i> (r <sup>-</sup> m <sup>+</sup> ) <i>ihfA::Km</i>                                                                                                                    | [4]               |
| KT2442           | mt-2 <i>hsdR1</i> (r <sup>-</sup> m <sup>+</sup> ) Rif <sup>r</sup>                                                                                                                          | [5]               |
| MPO401           | mt-2 <i>hsdR1</i> (r <sup>-</sup> m <sup>+</sup> ) Rif <sup>r</sup> <i>cbrB::Km</i>                                                                                                          | [6]               |
| MPO500           | mt-2 <i>hsdR1</i> (r <sup>-</sup> m <sup>+</sup> ) Rif <sup>r</sup> PP2812:: <i>pMO486</i> . Km <sup>r</sup>                                                                                 | This work         |
| MPO504           | mt-2 <i>hsdR1</i> (r <sup>-</sup> m <sup>+</sup> ) Rif <sup>r</sup> PP2812:: <i>pMO486</i> . FRT- Km excised                                                                                 | This work         |
| Plasmids         | Description                                                                                                                                                                                  | Reference/ source |
| pET-14b          | Expression vector carrying an N-terminal His•Tag® sequence followed by a thrombin cleavage site and three cloning sites under T7 promoter. Ap <sup>r</sup>                                   | Novagen           |
| pIZ227           | pACYC184 containing <i>lacIq</i> and the T7 lisozyme gene. Cm <sup>r</sup>                                                                                                                   | [2]               |
| pMPO234          | Broad-host-range <i>trp-lacZ</i> transcriptional fusion vector, based on pBBR1MCS-4. Ap <sup>r</sup>                                                                                         | [7]               |
| pMPO389          | Promoter region of <i>crcY</i> (coord. positions -273 and +6) into <i>SmaI/BamHI</i> in pUC18Sfi. Ap <sup>r</sup>                                                                            | This work         |
| pMPO420          | Transcriptional fusion of PP2810:: <i>lacZ</i> (coord. -472 to -10 from ATG) cloned as EcoRI/BamHI into plasmid pMPO234; Ap <sup>r</sup> Cb <sup>r</sup>                                     | This work         |
| pMPO422          | Transcriptional fusion of PP2810:: <i>lacZ</i> (coord. -408 to -10 from ATG) cloned as EcoRI/BamHI into the plasmid pMPO234. Contains a deletion of site F'; Ap <sup>r</sup> Cb <sup>r</sup> | This work         |
| pMPO425          | Substitution of site F1 of PP2810 promoter (TaTTAA to gcggcg) in plasmid pMPO422. Ap <sup>r</sup> Cb <sup>r</sup>                                                                            | This work         |
| pMPO426          | Substitution of site R1 of PP2810 promoter (GTAACA to agcctc) in plasmid pMPO422. Ap <sup>r</sup> Cb <sup>r</sup>                                                                            | This work         |
| pMPO428          | Substitution of site R2 of PP2810 promoter (aTAAAtg to gcggcg) in plasmid pMPO422. Ap <sup>r</sup> Cb <sup>r</sup>                                                                           | This work         |

|          |                                                                                                                                                          |                                      |
|----------|----------------------------------------------------------------------------------------------------------------------------------------------------------|--------------------------------------|
| pMPO436  | Substitution of site F1 of <i>crcZ</i> promoter (TGTTAC to gactct) in plasmid pMPO1316. Ap <sup>r</sup> Cb <sup>r</sup>                                  | This work                            |
| pMPO437  | Substitution of site R1 of <i>crcZ</i> promoter (GTAACA to tgctac) in plasmid pMPO1316. Ap <sup>r</sup> Cb <sup>r</sup>                                  | This work                            |
| pMPO438  | Substitution of site R2 of <i>crcZ</i> promoter (GTAACg to taccgt) in plasmid pMPO1316. Ap <sup>r</sup> Cb <sup>r</sup>                                  | This work                            |
| pMPO439  | Substitution of site F1 of <i>crcY</i> promoter (TGTTAC to gactct) in plasmid pMPO1314. Ap <sup>r</sup> Cb <sup>r</sup>                                  | This work                            |
| pMPO440  | Substitution of site R1 of <i>crcY</i> promoter (acAgCA to tgcgac) in plasmid pMPO1314. Ap <sup>r</sup> Cb <sup>r</sup>                                  | This work                            |
| pMPO441  | Substitution of site R' of <i>crcY</i> promoter (GTAACA to taccgt) in plasmid pMPO1314. Ap <sup>r</sup> Cb <sup>r</sup>                                  | This work                            |
| pMPO442  | Substitution of site R2 of <i>crcY</i> promoter (GaAACA to tctcat) in plasmid pMPO1314. Ap <sup>r</sup> Cb <sup>r</sup>                                  | This work                            |
| pMPO486  | Coding region of PP2812 (coord. + 123 to +657 from ATG) cloned as BamHI/EcoRI into pMPO1012. Km <sup>r</sup>                                             | This work                            |
| pMPO1012 | Mobilizable expression vector, Cole1, Km <sup>r</sup> . Modified from pFPV25 [8]                                                                         | B. Mesa and A. Flores, unpublished   |
| pMPO1229 | Expression vector derived from pET14b based on pT7-7 to overproduce CbrB cloned as NdeI/BamHI. Ap <sup>r</sup>                                           | [6]                                  |
| pMPO1314 | Transcriptional fusion of <i>crcY::lacZ</i> (coord. -195 and -2 from TSS) in cloned as EcoRI/BamHI into plasmid pMPO234; Ap <sup>r</sup> Cb <sup>r</sup> | [6]                                  |
| pMPO1316 | Transcriptional fusion of <i>crcZ::lacZ</i> (coord. -298 and -1 from TSS) in cloned as EcoRI/BamHI into plasmid pMPO234; Ap <sup>r</sup> Cb <sup>r</sup> | [6]                                  |
| pMPO1342 | Promoter region of <i>PP2810</i> (coord. -394 to -144 from ATG) cloned as a <i>SmaI/XbaI</i> fragment into pUC18Sfi. Ap <sup>r</sup>                     | This work                            |
| pMPO1343 | Promoter region of <i>PP2810</i> (coord. -334 to -88 from ATG) cloned into <i>XbaI/SmaI</i> pUC18Sfi. Ap <sup>r</sup>                                    | This work                            |
| pMRB117  | Promoter sequence of <i>flgB</i> (coord. -450 to +128 to ATG) into pMRB3. Ap <sup>r</sup> Cb <sup>r</sup>                                                | A. Leal and F. Govantes, unpublished |
| pUC18Sfi | Vector derived from pUC18 with <i>SfiI</i> flanking MCS                                                                                                  | [9]                                  |

---

## References for supplementary tables

1. Hanahan D. Studies on transformation of *Escherichia coli* with plasmids. *J Mol Biol.* 1983;166(4):557-80. Epub 1983/06/05. PubMed PMID: 6345791.
2. Govantes F, Santero E. Transcription termination within the regulatory *nifLA* operon of *Klebsiella pneumoniae*. *Molecular & general genetics : MGG.* 1996;250(4):447-54. Epub 1996/03/07. PubMed PMID: 8602162.
3. Bagdasarian M, Lurz R, Ruckert B, Franklin FC, Bagdasarian MM, Frey J, et al. Specific-purpose plasmid cloning vectors. II. Broad host range, high copy number, RSF1010-derived vectors, and a host-vector system for gene cloning in *Pseudomonas*. *Gene.* 1981;16(1-3):237-47. Epub 1981/12/01. PubMed PMID: 6282695.
4. Marques S, Gallegos MT, Manzanera M, Holtel A, Timmis KN, Ramos JL. Activation and repression of transcription at the double tandem divergent promoters for the *xyIR* and *xyIS* genes of the TOL plasmid of *Pseudomonas putida*. *Journal of bacteriology.* 1998;180(11):2889-94. Epub 1998/06/06. PubMed PMID: 9603877; PubMed Central PMCID: PMC107254.
5. Franklin FC, Bagdasarian M, Bagdasarian MM, Timmis KN. Molecular and functional analysis of the TOL plasmid pWWO from *Pseudomonas putida* and cloning of genes for the entire regulated aromatic ring meta cleavage pathway. *Proceedings of the National Academy of Sciences of the United States of America.* 1981;78(12):7458-62. Epub 1981/12/01. PubMed PMID: 6950388; PubMed Central PMCID: PMC349287.
6. Garcia-Maurino SM, Perez-Martinez I, Amador CI, Canosa I, Santero E. Transcriptional activation of the *CrcZ* and *CrcY* regulatory RNAs by the *CbrB* response regulator in *Pseudomonas putida*. *Molecular microbiology.* 2013;89(1):189-205. Epub 2013/05/23. doi: 10.1111/mmi.12270. PubMed PMID: 23692431.
7. Porrua O, Garcia-Gonzalez V, Santero E, Shingler V, Govantes F. Activation and repression of a sigmaN-dependent promoter naturally lacking upstream activation sequences. *Molecular microbiology.* 2009;73(3):419-33. Epub 2009/07/03. doi: 10.1111/j.1365-2958.2009.06779.x. PubMed PMID: 19570137.
8. Valdivia RH, Falkow S. Bacterial genetics by flow cytometry: rapid isolation of *Salmonella typhimurium* acid-inducible promoters by differential fluorescence induction. *Mol Microbiol.* 1996;22(2):367-78. PubMed PMID: 8930920.
9. Herrero M, de Lorenzo V, Timmis KN. Transposon vectors containing non-antibiotic resistance selection markers for cloning and stable chromosomal insertion of foreign genes in gram-negative bacteria. *Journal of bacteriology.* 1990;172(11):6557-67. Epub 1990/11/01. PubMed PMID: 2172216; PubMed Central PMCID: PMC526845.
