# Supplementary material for: The CbrB Regulon: Promoter dissection reveals novel insights into the CbrAB expression network in Pseudomonas putida
Source: PubMed Central journal article supplement (PMC6296734; doi:10.1371/journal.pone.0209191), 2018-12-17
Supplement: pone.0209191.s006.pdf [file pone.0209191.s006.pdf]

**S2 Table. Oligonucleotides used in this study**

| <b>Oligonucleotide</b> | <b>Sequence (5' to 3')</b>                                                      |
|------------------------|---------------------------------------------------------------------------------|
| crcYBamHI              | TTTGGATCCTTGTGTACCAGAGATA                                                       |
| crcYSmaI               | AAACCCGGGCCTGCTGATAGCCGCCG                                                      |
| crcZ49-1Q              | AACGGCTCACGCACAATAAAA                                                           |
| crcZ99-2Q              | AATCAGTTAGCTGCGCCTCC                                                            |
| crcY72fwd              | TTGTGTGGGTGAAGTGTACCTCCCGCACATTTACAGCAAA<br>AAATCGGGTAACAGGGAAACAAATCGGCAGAA    |
| crcY72rev              | TTTTCTGCCGATTTGTTTCCCTGTTACCCGATTTTTTGCTGTGA<br>AATGTGCGGGAGGTAACACTTCACCCACAC  |
| crcY72mut1fwd          | TTGTGTGGGTGAAGGACTCTCTCCCGCACATTTACAGCAAA<br>AAATCGGGTAACAGGGAAACAAATCGGCAGAA   |
| crcY72mut1rev          | TTTTCTGCCGATTTGTTTCCCTGTTACCCGATTTTTTGCTGTGA<br>AATGTGCGGGAGAGAGTCCCTTCACCCACAC |
| crcY72mut2fwd          | TTGTGTGGGTGAAGTGTACCTCCCGCACATTTCTGCGACAA<br>AAATCGGGTAACAGGGAAACAAATCGGCAGAA   |
| crcY72mut2rev          | TTTTCTGCCGATTTGTTTCCCTGTTACCCGATTTTTGTGCGCAG<br>AAATGTGCGGGAGGTAACACTTCACCCACAC |
| crcY72mut3fwd          | TTGTGTGGGTGAAGTGTACCTCCCGCACATTTACAGCAAA<br>AAATCGGTACCGTGGGAAACAAATCGGCAGAA    |
| crcY72mut3rev          | TTTTCTGCCGATTTGTTTCCACGGTACCGATTTTTTGCTGTG<br>AAATGTGCGGGAGGTAACACTTCACCCACAC   |
| crcY72mut4fwd          | TTGTGTGGGTGAAGTGTACCTCCCGCACATTTACAGCAAA<br>AAATCGGGTAACAGGTCTCATAATCGGCAGAA    |
| crcY72mut4rev          | TTTTCTGCCGATTATGAGACCTGTTACCCGATTTTTTGCTGTG<br>AAATGTGCGGGAGGTAACACTTCACCCACAC  |
| crcZ72fwd              | TTCCCGTAAAAATCTGTTACCCAAGCTTTCCGCCGTAACAGT<br>CCCCGAGGCGTACGGTAACGAAATTGCGACAT  |
| crcZ72rev              | TTATGTCGCAATTTTCGTTACCGTACGCCTCGGGGACTGTTAC<br>GGCGGAAAGCTTGGGTAACAGATTTTTACGGG |
| crcZ72mut1fwd          | TTCCCGTAAAAATCTGTTACCCAAGCTTTCCGCCGTAACAGT<br>CCCCGAGGCGTACGGTAACGAAATTGCGACAT  |
| crcZ72mut1rev          | TTATGTCGCAATTTTCGTTACCGTACGCCTCGGGGACTGTTACG<br>GCGGAAAGCTTGGAGAGTCGATTTTTACGGG |
| crcZ72mut2fwd          | TTCCCGTAAAAATCTGTTACCCAAGCTTTCCGCCTGCTACGT<br>CCCCGAGGCGTACGGTAACGAAATTGCGACAT  |
| crcZ72mut2rev          | TTATGTCGCAATTTTCGTTACCGTACGCCTCGGGGACGTAGCA<br>GGCGGAAAGCTTGGGTAACAGATTTTTACGG  |
| crcZ72mut3fwd          | TTCCCGTAAAAATCTGTTACCCAAGCTTTCCGCCGTAACAG<br>TCCCCGAGGCGTACGTACCGTAAATTGCGACAT  |
| crcZ72mut3rev          | TTATGTCGCAATTTACGGTACGTACGCCTCGGGGACTGTTA<br>CGGCGGAAAGCTTGGGTAACAGATTTTTACGGG  |
| EMSA3420HKF            | aaatctagaCATCATGGAACGTTTCGGCG                                                   |
| EMSA3420HKR            | gggcccgggGAATTCACGCAAGGGTACGG                                                   |
| EMSAoprDF              | aaatctagaCGCTTCAGGCGGAAAACAG                                                    |
| EMSAoprDR              | tttcccgggTTCCATGTCGCAAATCACGC                                                   |
| foot2810smaF+          | TTTcccgggAAAGCCTGCTTTTTTACCGC                                                   |
| foot2810smaR-          | TTTcccgggTGATCAACTGACCATGTTCAT                                                  |
| foot2810XbaF-          | AAAtctagaGTCATGGGCCTGGATAAGC                                                    |
| foot2810XbaR+          | TTTtctagaTAGGCGGATTACGCTAGAG                                                    |
| FusercZFEco            | CCCGAATTCTACCAGCGAATAACCCA                                                      |
| FusioncrcYF            | CCGAATTCCAGCGCACAATAGG                                                          |
| FusioncrcYRbisBam      | CACGGATCCAGAGATATAGCAGGGT                                                       |

|                 |                               |
|-----------------|-------------------------------|
| PP2810EMSAXbaIF | CGGtctagaATGGGTGAATCATTCGCGTC |
| PP2810EMSASmaR  | ACAaccgggAGCGACATGATCAACTGACC |
| PP2810F         | GTTGAATTCGTTGCGGGTTGGTTAACG   |
| PP2810fwmut     | TGCGAATTCTCCATGGCGGGCGAAA     |
| PP2810mutIF     | GGTGGCGCACGCGGCGAAGGCATCTT    |
| PP2810mutIR     | AAGATGCCTTCGCCGCGTGCGCCACC    |
| PP2810mutIIF    | GCATCTTTTGAGCCTCCATGTTTCCT    |
| PP2810mutIIIF   | CTTACTTCCCGGCGGCGTGCAGGCGC    |
| PP2810mutIIIR   | GCGCCTGCACGCCCGCGGAAGTAAG     |
| PP2810mutIIR    | AGGAAACATGGAGGCTCAAAAGATGC    |
| PP2810R         | GGAGGATCCGACACTTCCGACCGT      |
| QflgbF          | GGCGCTTGGTATTCACGAAA          |
| QflgBR          | ATGTCACGGGCCTTGTAGTT          |
| QPP0952F        | TGAAACCATCGCTCGTCCTAA         |
| QPP0952R        | TGAGGTGTCATCGTCAGTTGCT        |
| QPP1206F        | TCAAGACCCGCATGCTGTATTT        |
| QPP1206R        | CGCCTTCGTTGTTACGGAAGT         |
| QPP3009F        | TTGCTGTGCTGGTACTCGATCT        |
| QPP3009R        | GGATGGCGTTGAGAAACACATA        |
| QPP3074F        | ACCCACAGATCCAGAACATCA         |
| QPP3074R        | GGTGGTGTGAAGAAGGTGCTG         |
| QPP3420F        | CCCGTACCCTTGCGTGAAT           |
| QPP3420R        | GGCTGATCACCGAAAACCA           |
| QPP3656F        | ACACTGCTAGTCGCGCCTTATG        |
| QPP3656R        | CTTTGAAGTCTTCCACGAACG         |
| QPP4050F        | CGAACAAGCGCAAGATTCTGT         |
| QPP4050R        | TTCACCAGGTCGGCGATTT           |
| QPP4486F        | TGTTTTCCCTGGTGTGCGA           |
| QPP4486R        | GCTTCGATGCCGATTTTCAG          |
| QPP4643F        | CGCTGATCGGCTTTCTGAT           |
| QPP4643R        | AACTTGGTGATGCGCGAGA           |
| sec2810cad+     | CTAGAGTCATGGGCCTGGATAAGC      |
| sec2810cad-     | CTAGATAGGCGGATTACGCTAGAG      |
| Ymut1F          | GTGGGTGAAGGACTCTCTCCCGCACA    |
| Ymut1R          | TGTGCGGGAGAGAGTCCTTACCCAC     |
| Ymut2F          | CGCACATTTCTGCGACAAAAATCGGG    |
| Ymut2R          | CCCGATTTTTGTGCGAGAAATGTGCG    |
| Ymut3F          | AAAAAATCGGTACCGTGGGAAACAAA    |
| Ymut3R          | TTTGTTTCCACGGTACCGATTTTTT     |
| Ymut4F          | GGGTAACAGGtctcatAATCGGCAGA    |
| Ymut4R          | TCTGCCGATTatgagaCCTGTTACCC    |
| ZbisBam         | CACGGATCCAAACATATAGCAGGTG     |
| Zmut1F          | CGTAAAAATCGACTCTCCAAGCTTTC    |
| Zmut1R          | GAAAGCTTGGAGAGTCGATTTTTACG    |
| Zmut2F          | GCTTCCCGCCTGCTACGTCCCCGAGG    |
| Zmut2R          | CCTCGGGGACGTAGCAGGCGGAAAGC    |
| Zmut3F          | GAGGCGTACGTACCGTAAATTGCGAC    |
| Zmut3R          | GTCGCAATTTACGGTACGTACGCCTC    |
